# Supplementary material for: Highly efficient luminescent hybrid materials covalently linking with europium(iii) complexes via a novel fluorinated β-diketonate ligand: synthesis, characterization and photophysical properties
Source: Royal Society of Chemistry journal article supplement (doi:10.1039/c0dt00316f), 2010-01-01
Supplement: c0dt00316f.pdf [file c0dt00316f.pdf]

## Supporting Information

### Highly Efficient Luminescent Hybrid Materials Covalently Linking with Europium(III) Complexes *Via* a Novel Fluorinated $\beta$ -Diketonate Ligand: Synthesis, Characterization and Photo physical Properties

Biju Francis, D. B. Ambili Raj and M. L. P. Reddy\*

*Chemical Sciences and Technology Division, National Institute for Interdisciplinary Science & Technology (NIIST), CSIR, Thiruvananthapuram 695 019, India*

\*E-mail: [mlpreddy55@gmail.com](mailto:mlpreddy55@gmail.com)

**Fig. S1**  $^1\text{H}$  NMR spectrum of the ligand HBBPPF.

**Fig. S2**  $^{13}\text{C}$  NMR spectrum of the ligand HBBPPF.

**Fig. S3** Thermo gravimetric curve for (1)  $\text{Eu}(\text{BBPPF})_3(\text{DDXPO})$  and (2)  $\text{Eu}(\text{BBPPF-Si})_3(\text{DDXPO})/\text{MCM-41}$ .

**Fig. S4**  $^1\text{H}$  NMR spectrum of the ligand SiBBPPF-Na.

**Fig. S5** Solid-state  $^{29}\text{Si}$  NMR spectra of MCM-41.

**Fig. S6** FT-IR spectra of (a) SiBBPPF-Na and (b)  $\text{Eu}(\text{SiBBPPF})_3(\text{DDXPO})/\text{MCM-41}$ .

**Fig. S7**  $\text{N}_2$  adsorption-desorption isotherms for complex **2**.

**Fig. S8** DLS particle size distribution curve of **2**.

**Fig. S9** UV absorption spectra of DDXPO, HBBPPF and the complex (1)  $\text{Eu}(\text{BBPPF})_3(\text{DDXPO})$  in acetonitrile solution ( $c = 2 \times 10^{-5}$  M). All spectra are normalized to a constant intensity at the maximum.

**Fig. S10** Experimental luminescence decay profiles of (1)  $\text{Eu}(\text{BBPPF})_3(\text{DDXPO})$  and (2)  $\text{Eu}(\text{BBPPF-Si})_3(\text{DDXPO})/\text{MCM-41}$  monitored around 612 nm and excited at their maximum emission wave lengths.

**Fig. S11** CIE ( $x,y$ ) chromaticity diagram showing the emission colour coordinates of complexes **1** and **2**.

**Fig. S12** Room-temperature emission spectrum of DDXPO (a), UV-vis absorption spectra of HBBPPF (b), room-temperature emission spectrum of HBBPPF (c), 77 K phosphorescence spectra of  $\text{Gd}(\text{BBPPF})_3(\text{H}_2\text{O})(\text{C}_2\text{H}_5\text{OH})$  (d), 77 K phosphorescence spectra of  $\text{Gd}(\text{DDXPO})(\text{NO}_3)_3$  (e); All spectra are in solid state and normalized to a constant intensity at the maximum.

**Fig. S13** Phosphorescence spectra of (a)  $\text{Gd}(\text{SiBBPPF})_3(\text{H}_2\text{O})(\text{C}_2\text{H}_5\text{OH})$  and (b)  $\text{Gd}(\text{BBPPF})_3(\text{H}_2\text{O})(\text{C}_2\text{H}_5\text{OH})$  at 77K.

**Fig. S14** Schematic energy level diagram and energy transfer processes for complex **1**.  $S_1$  represents the first excited singlet state and  $T_1$  represents the first excited triplet state.

**Table S1.** FT-IR data of SiBBPPF-Na and complex **2**.

### **Determination of absolute quantum yield**

The Xe-arc lamp was used to excite the samples placed in the sphere. Samples were prepared by drop casting the material placed between two quartz cover slips. The quantum yield was determined by comparing the spectral intensities of the lamp and the sample emission as reported in the literature. Using this experimental setup and the integrating sphere system,<sup>1</sup> the solid-state quantum yield of thin film of the standard green OLED material tris-8-hydroxyquinolinolato aluminum ( $Alq_3$ ) was determined to be 0.19,<sup>2</sup> which is consistent with previously reported values. Each sample was measured several times under slightly different experimental conditions. The estimated error for quantum yields is ( $\pm 10\%$ ).<sup>3</sup>

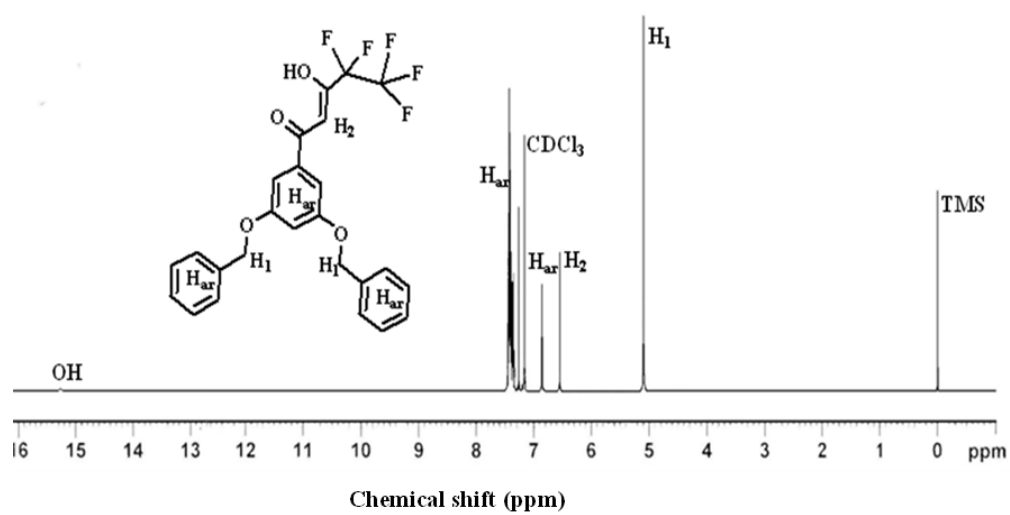

**Fig. S1** <sup>1</sup>H NMR spectrum of the ligand HBBPPF.

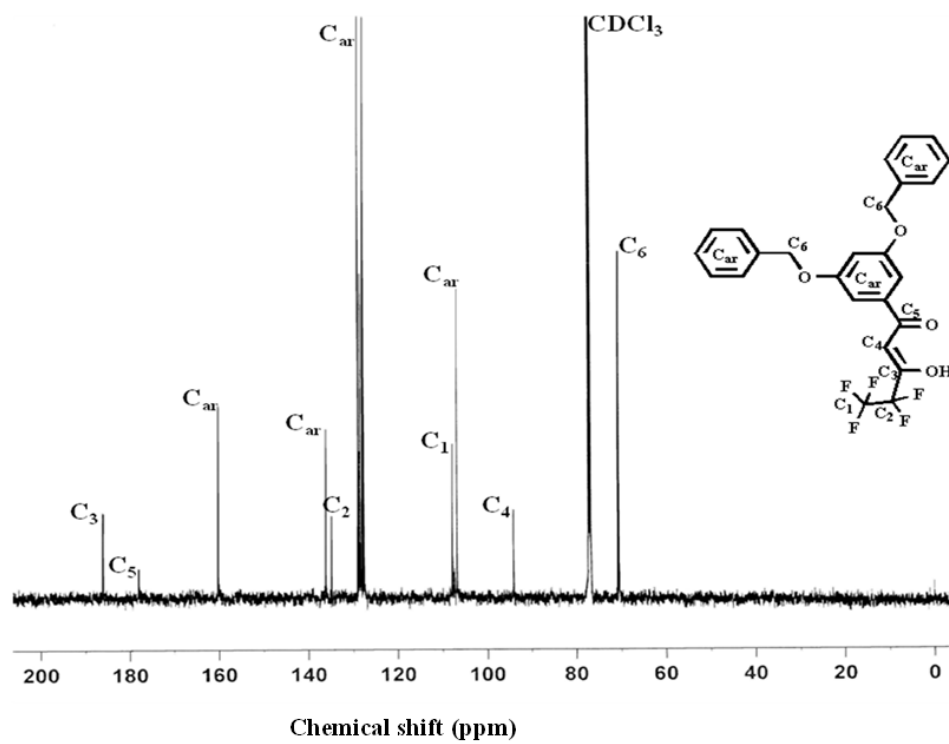

**Fig. S2**  $^{13}\text{C}$  NMR spectrum of the ligand HBBPPF.

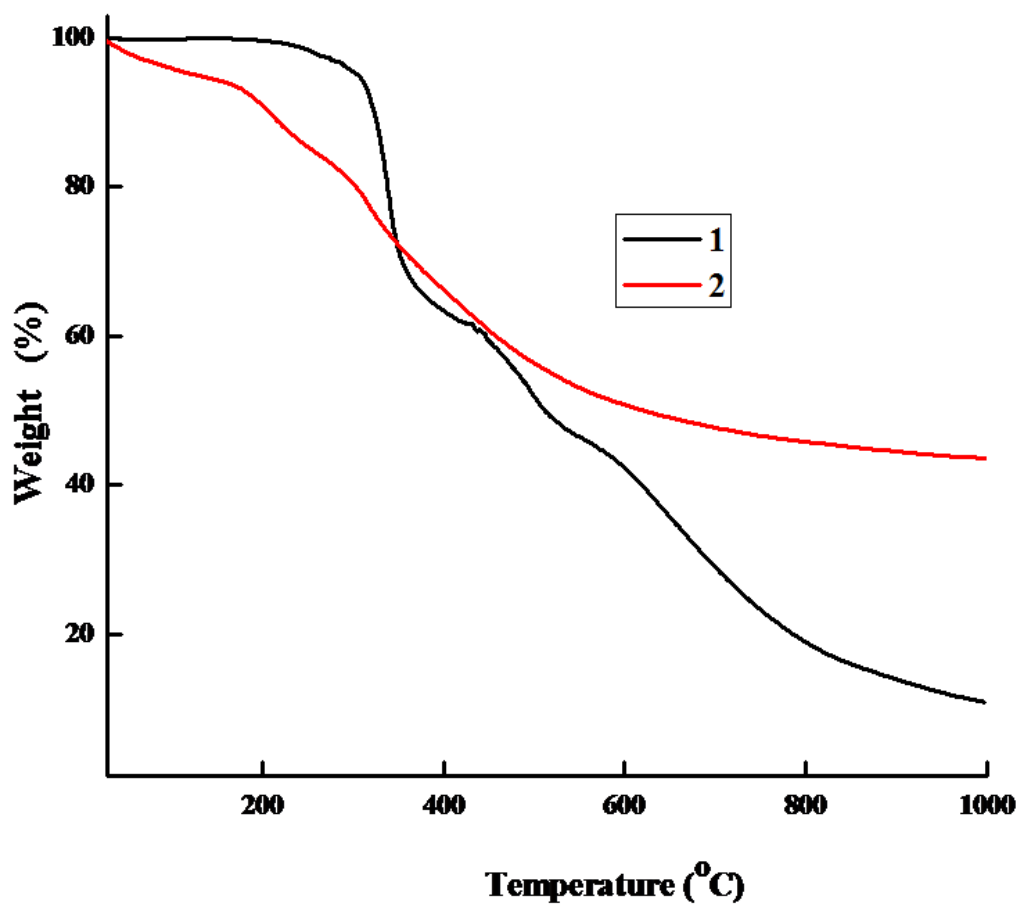

**Fig. S3** Thermo gravimetric curve for (1)  $\text{Eu}(\text{BBPPF})_3(\text{DDXPO})$  and (2)  $\text{Eu}(\text{BBPPF-Si})_3(\text{DDXPO})/\text{MCM-41}$ .

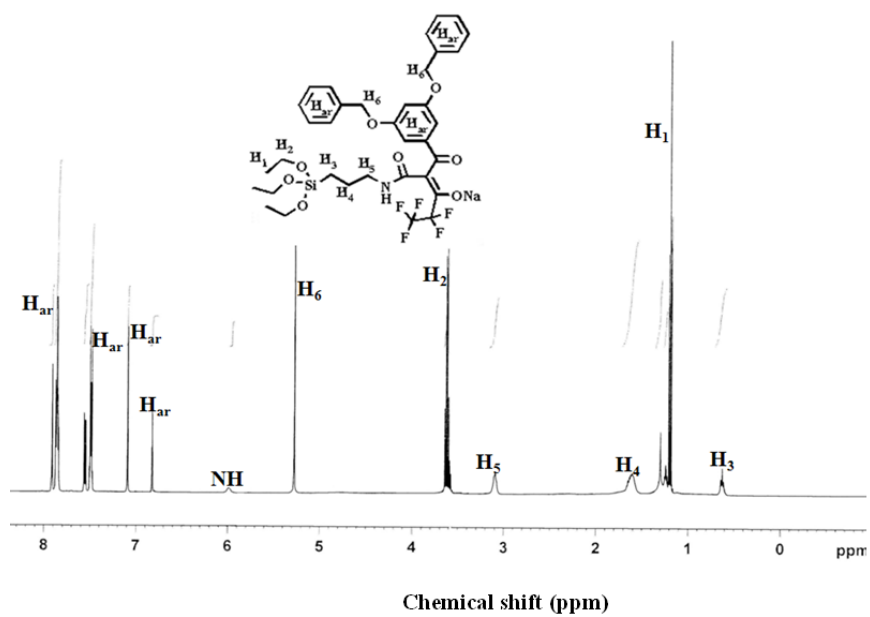

**Fig. S4**  $^1\text{H}$  NMR spectrum of the ligand SiBBPPF-Na.

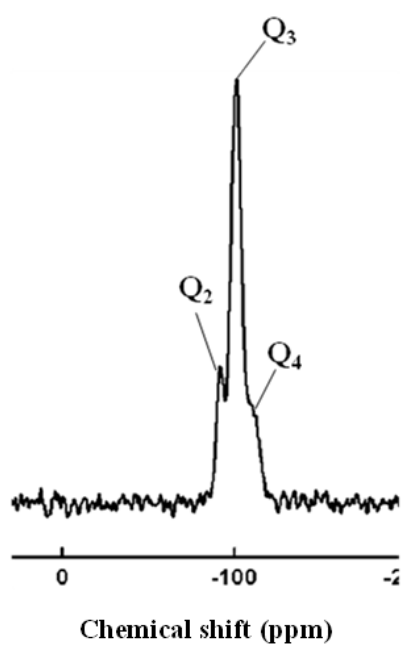

**Fig. S5** Solid-state  $^{29}\text{Si}$  NMR spectra of MCM-41.

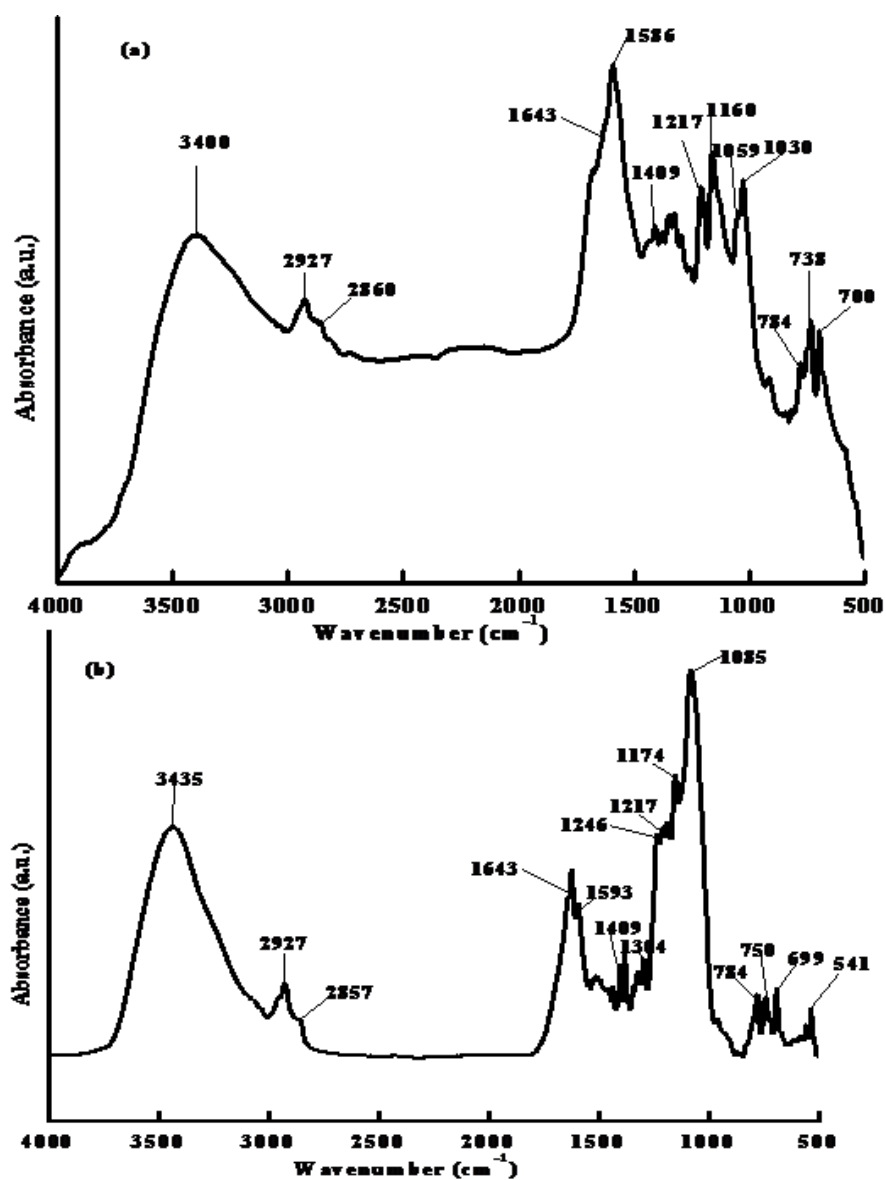

**Fig. S6** FT-IR spectra of (a) SiBBPPF-Na and (b) Eu(SiBBPPF)<sub>3</sub>(DDXPO)/MCM-41.



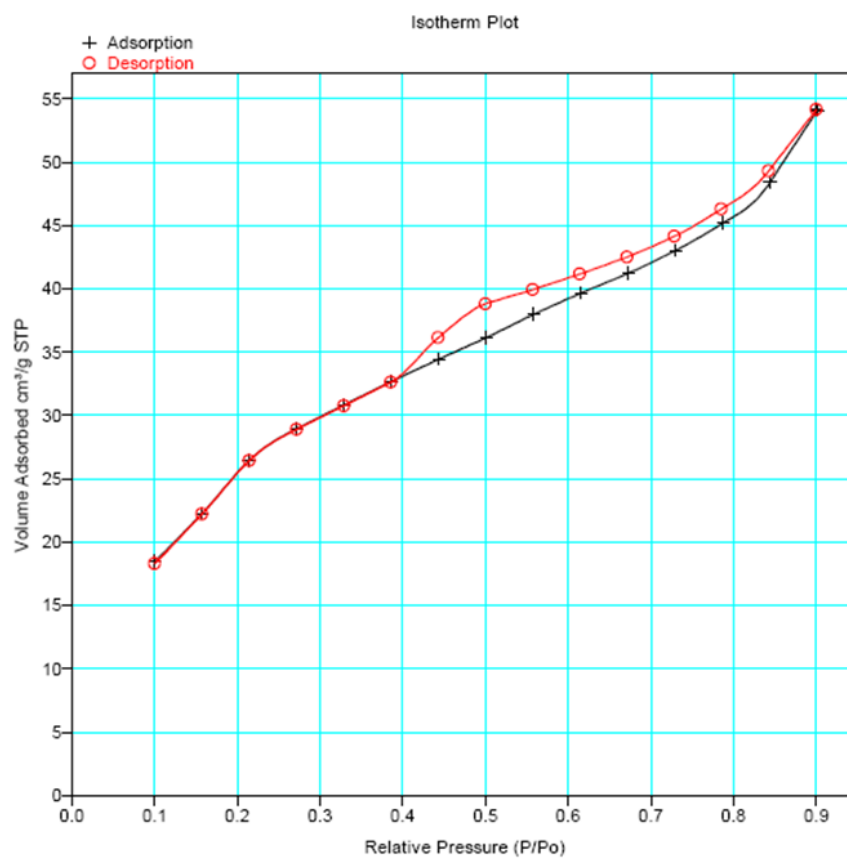

**Fig. S7** N<sub>2</sub> adsorption-desorption isotherms for complex 2.

|                               | Diam. (nm)           | % Intensity | Width (nm) |
|-------------------------------|----------------------|-------------|------------|
| <b>Z-Average (d.nm):</b> 7865 | <b>Peak 1:</b> 39.37 | 100.0       | 2.609      |
| <b>PdI:</b> 0.096             | <b>Peak 2:</b> 0.000 | 0.0         | 0.000      |
| <b>Intercept:</b> 0.913       | <b>Peak 3:</b> 0.000 | 0.0         | 0.000      |

**Result quality :** Good

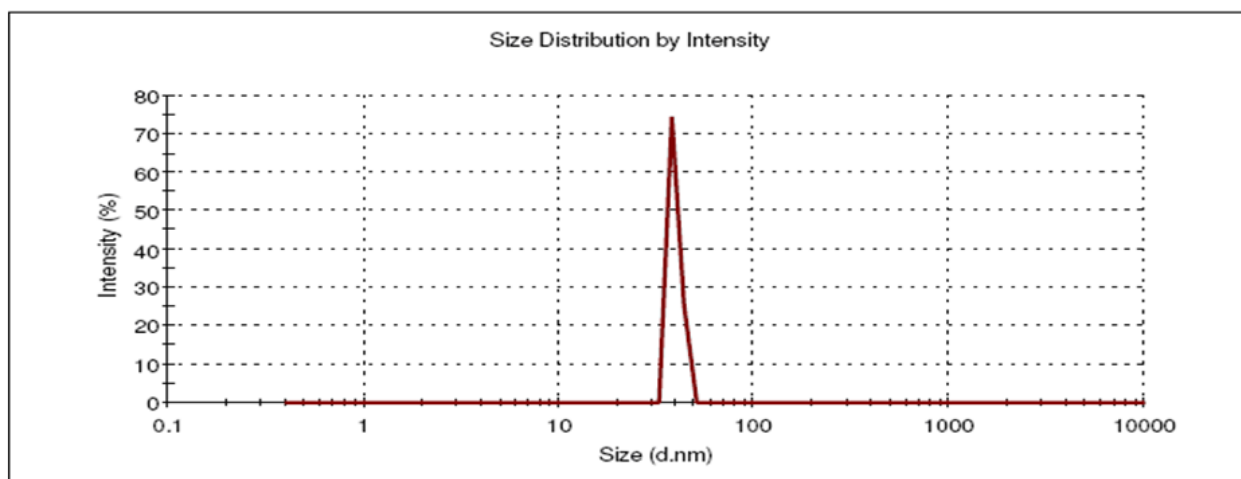

**Fig. S8** DLS particle size distribution curve of **2**.

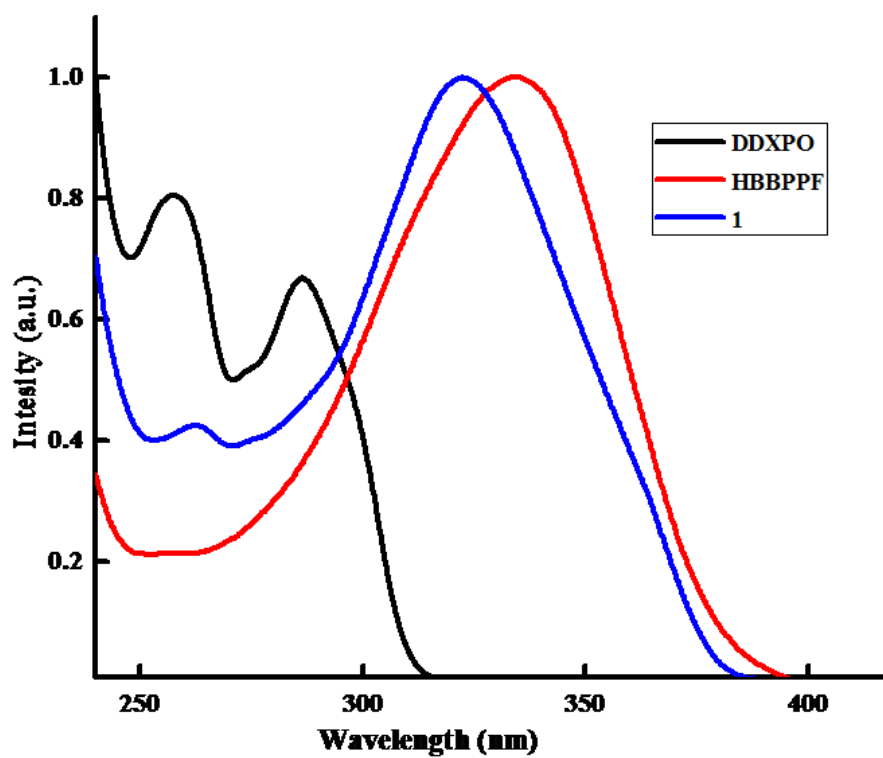

**Fig. S9** UV absorption spectra of DDXPO, HBBPPF and the complex (1)  $\text{Eu}(\text{BBPPF})_3(\text{DDXPO})$  in acetonitrile solution ( $c = 2 \times 10^{-5} \text{ M}$ ). All spectra are normalized to a constant intensity at the maximum.

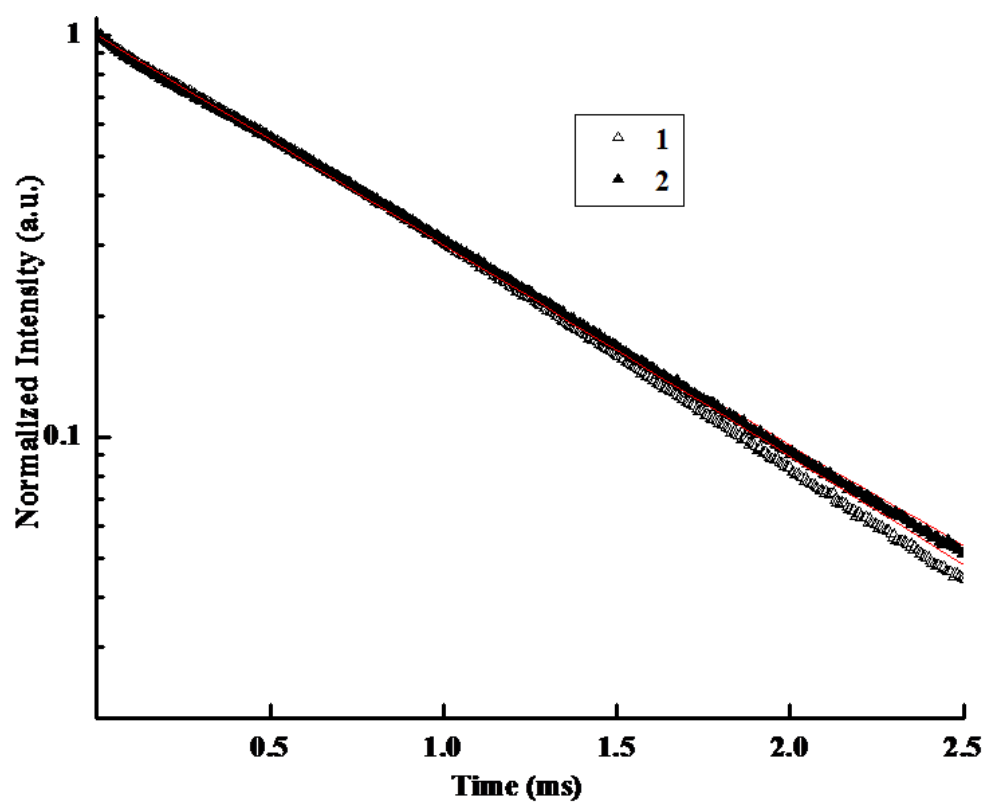

**Fig. S10** Experimental luminescence decay profiles of (1)  $\text{Eu}(\text{BBPPF})_3(\text{DDXPO})$  and (2)  $\text{Eu}(\text{BBPPF-Si})_3(\text{DDXPO})/\text{MCM-41}$  monitored around 612 nm and excited at their maximum emission wave lengths.

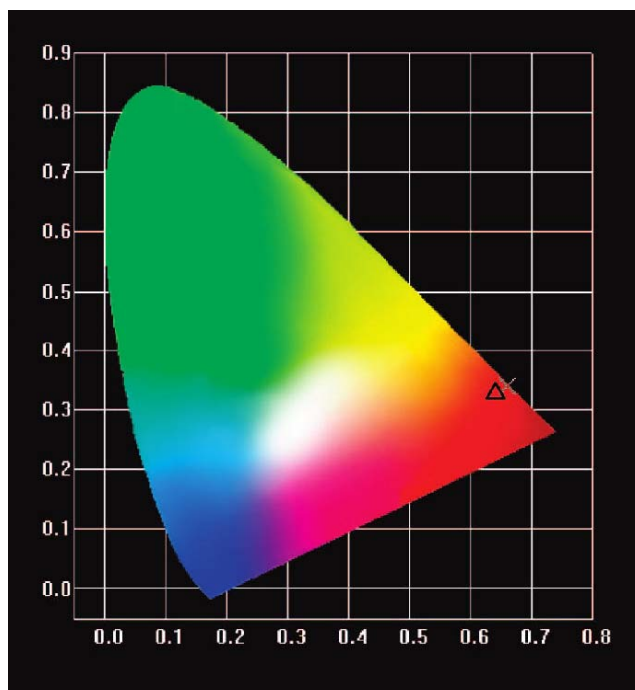

**Fig. S11** CIE ( $x,y$ ) chromaticity diagram showing the emission colour coordinates of complexes **1** and **2**.

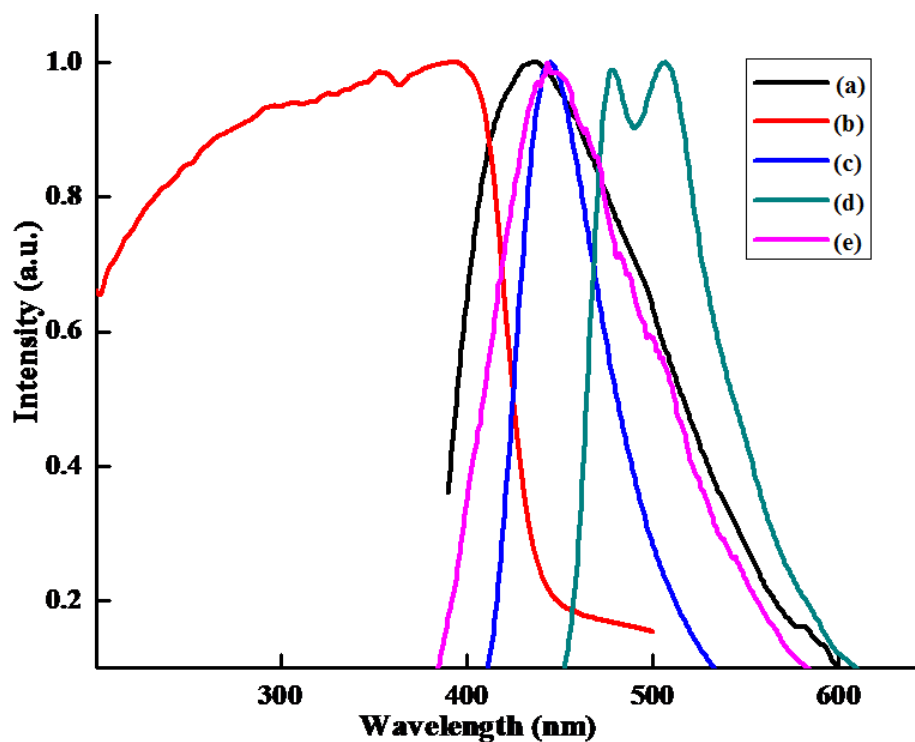

**Fig. S12** Room-temperature emission spectrum of DDXPO (a), UV-vis absorption spectra of HBBPPF (b), room-temperature emission spectrum of HBBPPF (c), 77 K phosphorescence spectra of  $\text{Gd}(\text{BBPPF})_3(\text{H}_2\text{O})(\text{C}_2\text{H}_5\text{OH})$  (d), 77 K phosphorescence spectra of  $\text{Gd}(\text{DDXPO})(\text{NO}_3)_3$  (e); All spectra are in solid state and normalized to a constant intensity at the maximum.

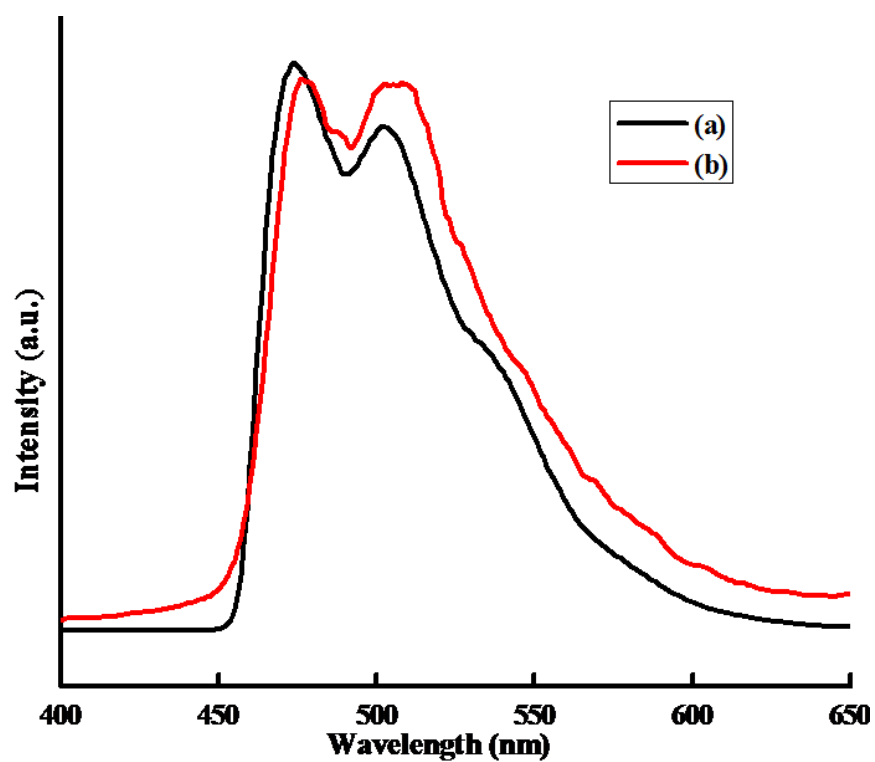

**Fig. S13** Phosphorescence spectra of (a)  $\text{Gd}(\text{SiBBPPF})_3(\text{H}_2\text{O})(\text{C}_2\text{H}_5\text{OH})$  and (b)  $\text{Gd}(\text{BBPPF})_3(\text{H}_2\text{O})(\text{C}_2\text{H}_5\text{OH})$  at 77K.

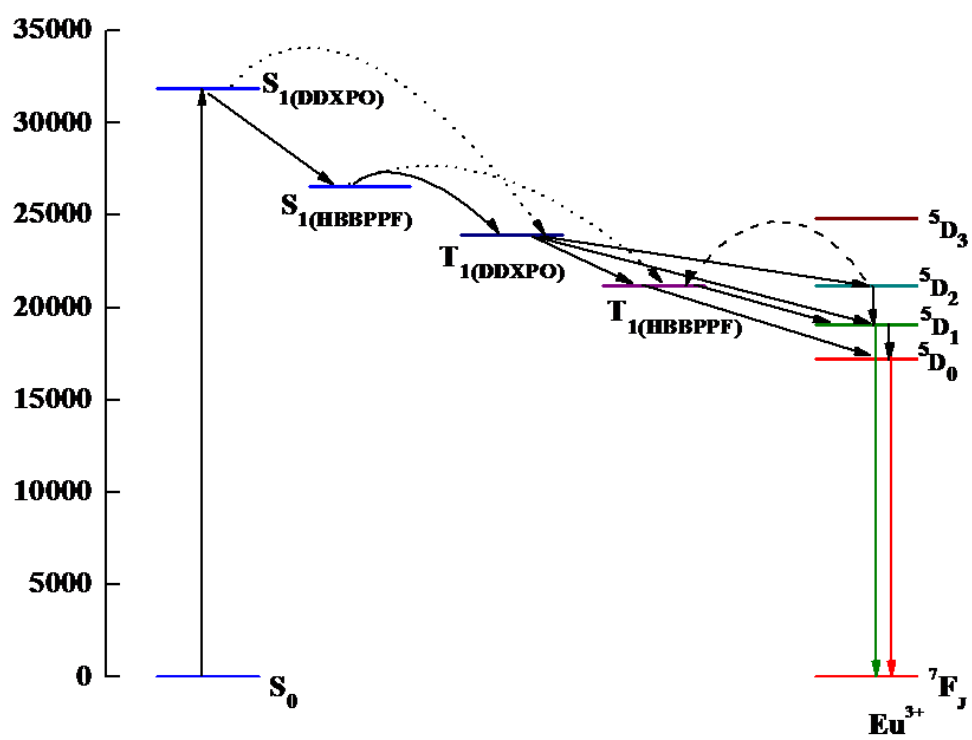

**Fig. S14** Schematic energy level diagram and energy transfer processes for complex 1.  $S_1$  represents the first excited singlet state and  $T_1$  represents the first excited triplet state.



**Table S1** Wave numbers ( $\text{cm}^{-1}$ ) observed in FT-IR spectra of SiBBPP-Na and  $\text{Eu}(\text{SiBBPP})_3(\text{XPO})/\text{MCM-41}$  (**2**) and the respective vibrational assignments.

| SiBBPPF-Na | <b>2</b> | Description                            |
|------------|----------|----------------------------------------|
| 3400       | 3435     | $\nu(\text{NH})$                       |
| 2927       | 2927     | $\nu(\text{C}_{\text{sp}^3}\text{-H})$ |
| 1643       | 1643     | $\nu(\text{C=O})$                      |
| 1586       | 1593     | $\nu(\text{C=O})$                      |
| 1409       | 1409     | $\delta \text{NH}$                     |
| 1217       | 1217     | $\nu(\text{C-Si})$                     |
| 1059       | 1059     | $\nu(\text{Si-O-Si})$                  |

## References

- 1 M. S. Wrighton, D. S. Ginley and D. L. Morse, *J.Phys.Chem.*, 1974, **78**, 2229.
- 2 (a) M. Colle, J. Gmeiner, W. Milius, H. Hillebrecht and W. Brütting, *Adv. Funct. Mater.*, 2003, **13**, 108; (b) N. S. SaleeshKumar, S. Varghese, N. P. Rath and S. Das, *J. Phys. Chem. C*, 2008, **112**, 8429.
- 3 S. V. Eliseeva, O. V. Kotova, F. Gumy, S. N. Semenov, V. G. Kessler, L. S. Lepnev, J. -C. G. Bünzli, N. P. Kuzmina, *J. Phys. Chem. A*, 2008, **112**, 3614.
